# Supplementary material for: A New Technique for the Extraction of Arbuscular Mycorrhizae Fungal Spores from Rhizosphere
Source: MDPI journal article supplement (doi:10.3390/jof9080845), 2023-08-14
Supplement: s1 [file s1]

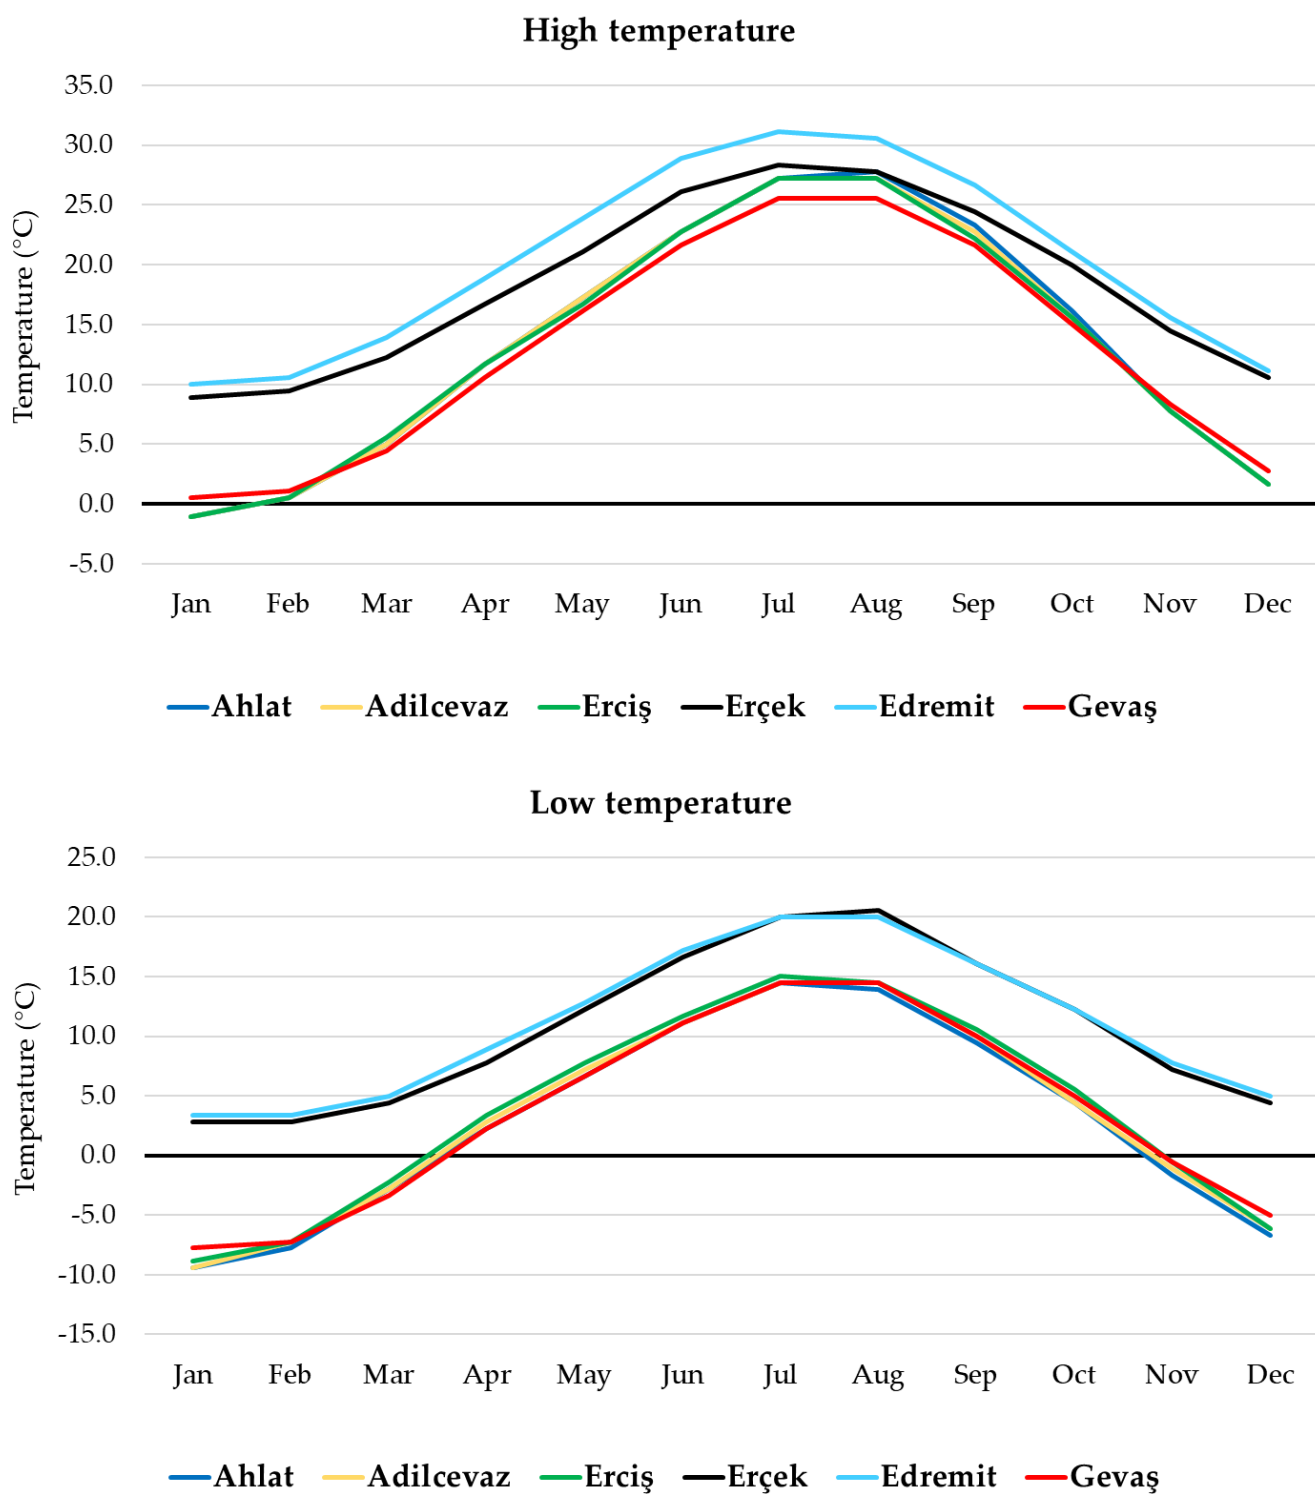

Figure S1. Average High and Low Temperature recorded at sampling sites. Data retrieved from <https://weatherspark.com/>

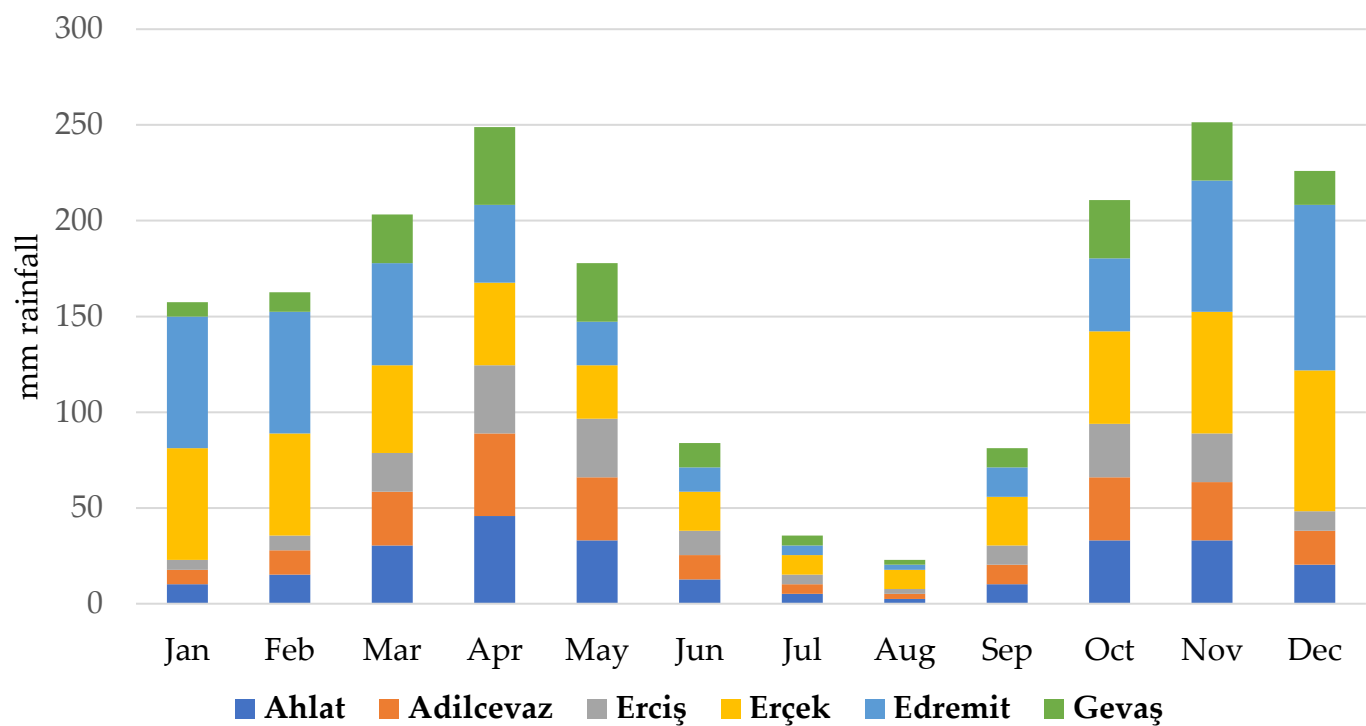

Figure S2. Average Monthly Rainfall recorded at sampling sites. Data retrieved from <https://weatherspark.com/>
